# Supplementary material for: An excited-state intramolecular proton transfer-based probe for the discrimination of thiophenols over aliphatic thiols
Source: Royal Society of Chemistry journal article supplement (doi:10.1039/c5ay02987b), 2016-01-01
Supplement: c5ay02987b1.pdf [file c5ay02987b1.pdf]

*Supporting Information for*

**An excited-state intramolecular proton transfer - based probe for  
discrimination of thiophenols over aliphatic thiols**

Xiaojun Hu, Wei Su, Qiulan Zhou, Peng Yin, Haitao Li \*, Shouzhao Yao

Key Laboratory of Chemical Biology and Traditional Chinese Medicine Research (Ministry of Education), College of Chemistry and Chemical Engineering, Hunan Normal University, Changsha 410081, PR China.

Corresponding author: Tel: +86-731-88865515; fax: +86-731-88865515;

E-mail address: [haitao-li@hunnu.edu.cn](mailto:haitao-li@hunnu.edu.cn)

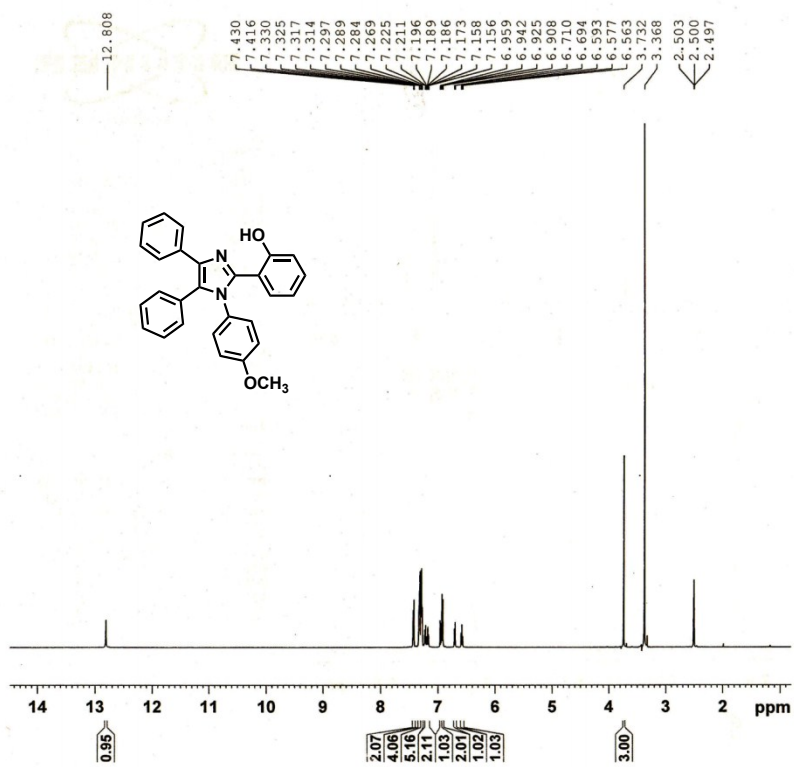

Fig. S1. <sup>1</sup>H NMR spectra of compound **DIP** in DMSO-*d*<sub>6</sub>

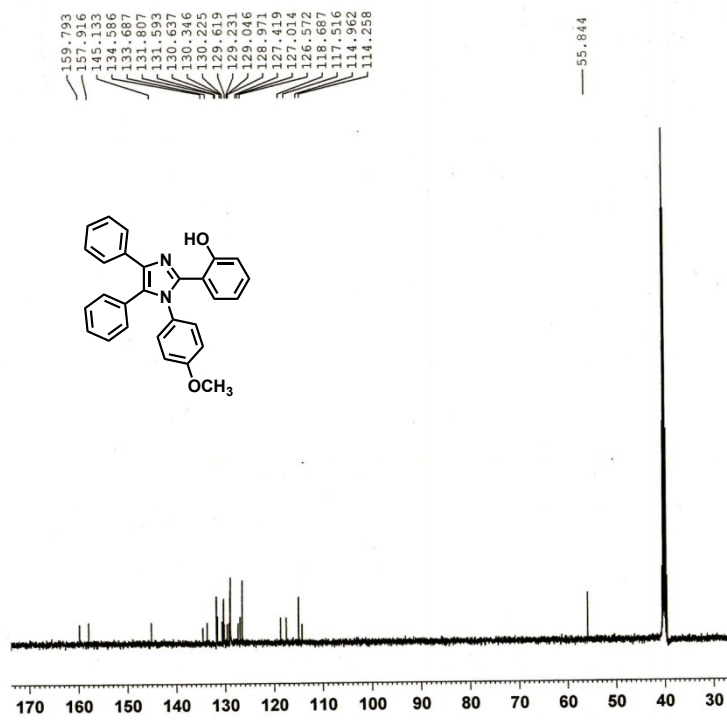

Fig. S2. <sup>13</sup>C NMR spectrum of compound **DIP** in DMSO-*d*<sub>6</sub>

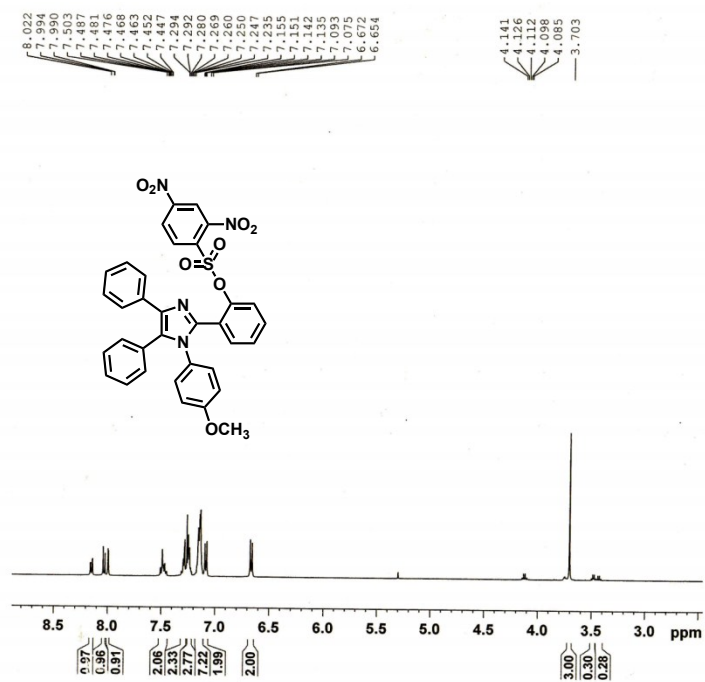

Fig. S3. <sup>1</sup>H NMR spectrum of DIPD in CDCl<sub>3</sub>

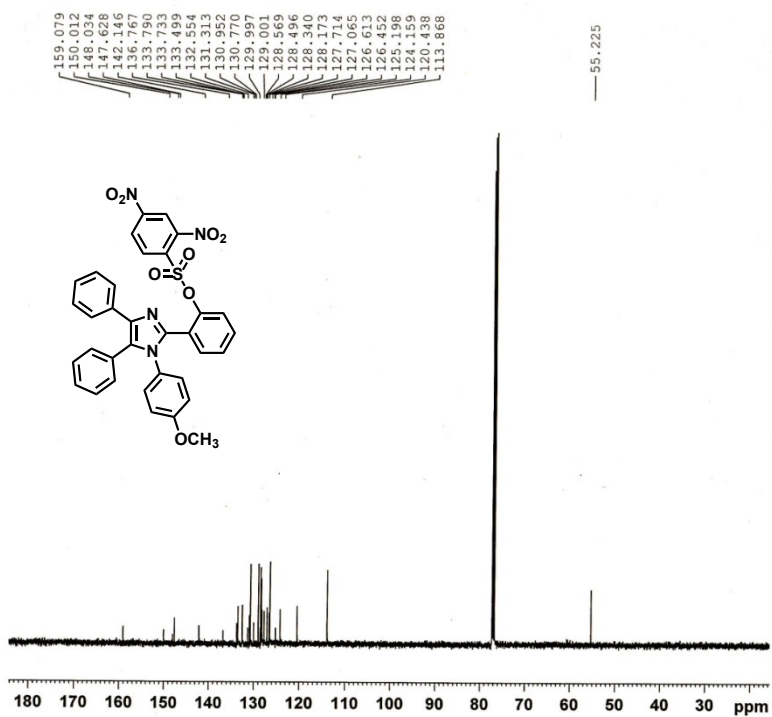

Fig. S4. <sup>13</sup>C NMR spectrum of DIPD in CDCl<sub>3</sub>

pw-150121-1 #35 RT: 0.77 AV: 1 SB: 3 0.03-0.07 NL: 2.22E7  
T: + c ESI ms [50.00-1300.00]

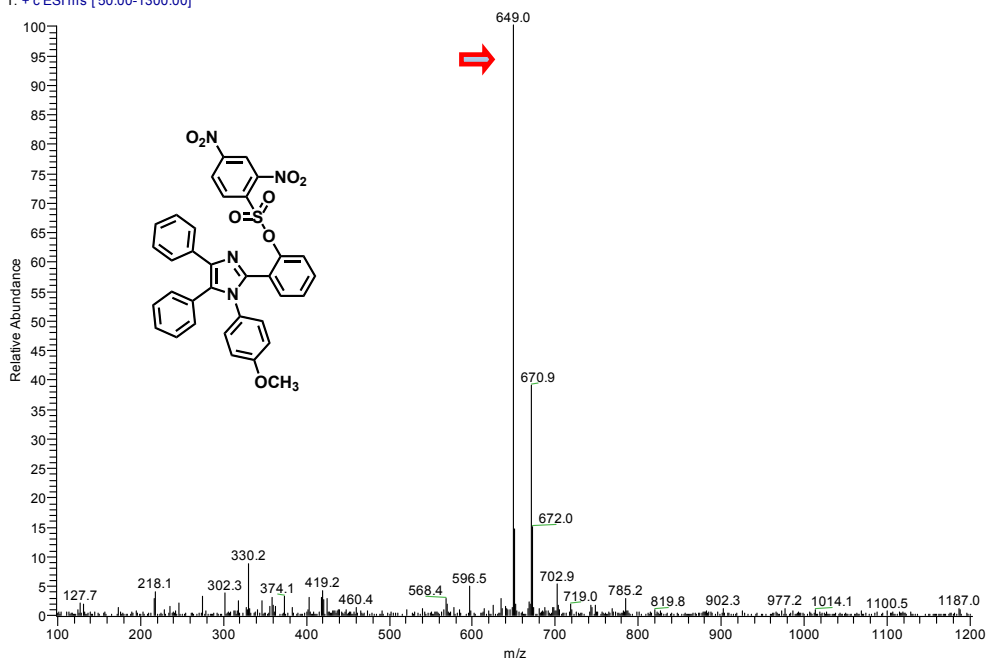

Fig. S5 ESI-MS spectrum of compound DIPD

pw-150121-2 #22 RT: 0.49 AV: 1 NL: 8.26E7  
T: + c ESI ms [50.00-1300.00]

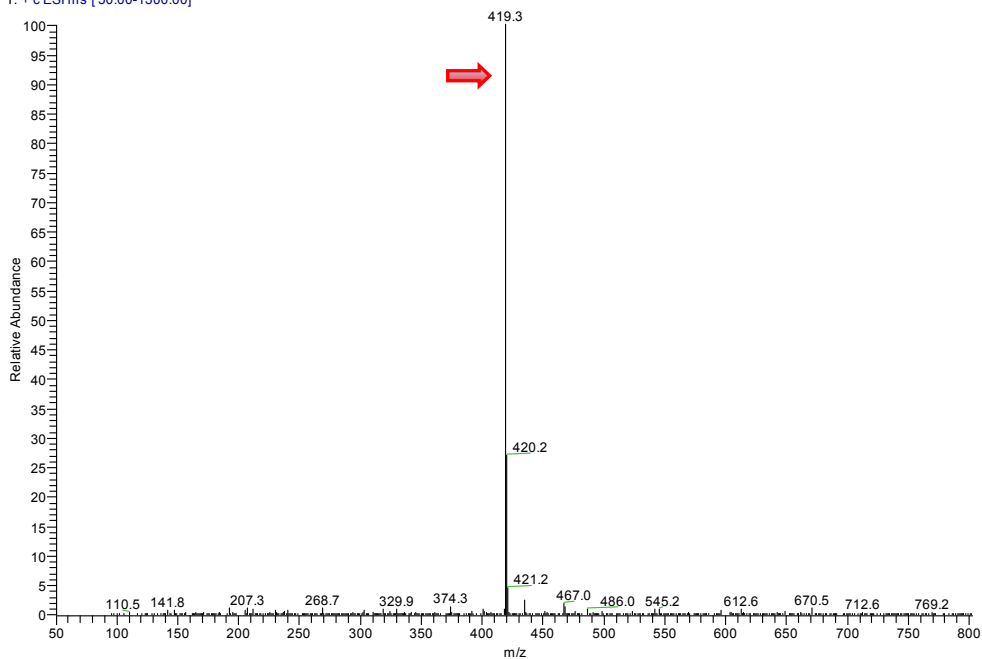

Fig. S6 ESI-MS spectrum of probe + PhSH

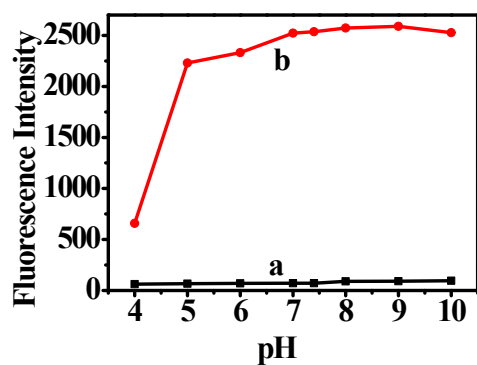

**Fig. S7.** Fluorescence intensity of probe **DIPD** (10  $\mu\text{mol/L}$ ) before (a) and after (b) addition of PhSH (10  $\mu\text{mol/L}$ ) in 10 mM PBS buffer of different pH containing 50 percent acetonitrile  $\lambda_{\text{ex}} = 290 \text{ nm}$ ,  $\lambda_{\text{em}} = 460 \text{ nm}$ . Slit: 2.5, 2.5 nm.

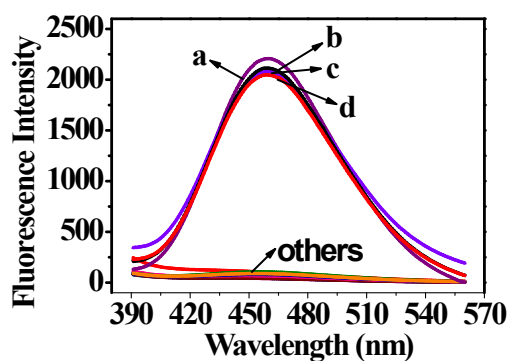

**Fig. S8.** Fluorescence responses of probe **DIPD** (10  $\mu\text{mol/L}$ ) toward thiophenos (6  $\mu\text{mol/L}$ ) and other substances (60  $\mu\text{mol/L}$ ) in 10 mM PBS buffer at room temperature. The fluorescence intensity at  $\lambda_{\text{em}} = 460 \text{ nm}$  was plotted versus substances: (a) probe + *p*-Toluenethiol, (b) probe + 2-aminobenzenethiol, (c) probe + PhSH, (d) probe + 4-chlorothiophenol and probe + others ( $\text{NaN}_3$ , KI, PhOH,  $\text{PhNH}_2$ , Ala, Pro, Arg, GSH, Hcy, Cys,  $\text{CH}_3(\text{CH}_2)_{10}\text{CH}_2\text{SH}$ ).
